# Supplementary material
Source: publisher figshare collection journal article supplement (https://gsapubs.figshare.com/articles/dataset/_/20076209)
Supplement: Supplementary file 1 [file 1]

## Sheet: data
Jiaolai Basin
Depth	Hg	Al	δ13Corg	TOC	S	S	Hg/TOC	Hg/Al	Hg/S	Average Hg/TOC	Enrichment factor
m	ppb	%	‰	%	ppm	%	ppb/%	ppb/%	ppb/%
0.6	2.55814	7.77703	-23.57	0.163574	574.367	0.0574367	15.639	0.328935	44.5384	25.4786	0.80923
2	2.01835	8.85142	-24.14	0.0790055	146.905	0.0146905	25.5469	0.228025	137.391	post-Hg spikes interval
3.2	1.36364	8.74764	-24.33	0.072341	109.584	0.0109584	18.8501	0.155886	124.438
4.65	0	8.46408	-22.99	0.071468	234.49	0.023449	0	0	0
6.3	0	7.95584	-23.73	0.0676473	154.602	0.0154602	0	0	0
7.35	1.04265	9.05791	-24.39	0.0738315	43.8379	0.00438379	14.1221	0.11511	237.843
8.3	0	8.4669	-23.9	0.0630181	199.506	0.0199506	0	0	0
10.17	1.00962	8.02835	-23.81	0.0714258	137.028	0.0137028	14.1352	0.125756	73.6795
12.55	2.59615	8.46645	-23.41	0.0712666	36.7767	0.00367767	36.4288	0.30664	705.923
13.07	2.68657	8.52892	-23.71	0.0712114	61.9549	0.00619549	37.7266	0.314995	433.633
15.15	4.88688	8.7921	-23.94	0.0844172	124.02	0.012402	57.8896	0.555826	394.038
16.5	0	3.67939	-23.45	0.0727444	192.224	0.0192224	0	0	0
17.05	1.83962	9.02762	-24.16	0.0654622	120.657	0.0120657	28.102	0.203777	152.467
17.8	2.12963	9.01146	-23.92	0.0639683	152.86	0.015286	33.292	0.236325	139.319
18.85	1.5534	8.95047	-24.21	0.0671895	93.5426	0.00935426	23.1196	0.173555	166.063
20.66	0	6.14451	-24.91	0.0617242	112.115	0.0112115	0	0	0
21.87	0	8.72714	-24.98	0.0704597	76.3505	0.00763505	0	0	0
23.05	3.94231	8.72858	-23.23	0.101994	56.6983	0.00566983	38.6523	0.451655	695.313
24.5	0	8.03098	-22.22	0.144291	150.209	0.0150209	0	0	0
25.7	0	8.64181	-22.05	0.187949	25.6301	0.00256301	0	0	0
26.45	1.67464	8.49715	-22.83	0.220524	95.2346	0.00952346	7.59392	0.197083	175.844
27.7	1.28889	7.65571	-23	0.126455	101.097	0.0101097	10.1925	0.168356	127.49
30.3	0	7.85281	-23.16	0.144671	137.387	0.0137387	0	0	0
31.45	1.19816	7.42279	-23.45	0.110408	88.1021	0.00881021	10.852	0.161416	135.996
33.5	1.80488	3.54654	-23.53	0.0657569	131.608	0.0131608	27.4477	0.508912	137.141
35.35	0	1.73357	-23.88	0.0636475	181.476	0.0181476	0	0	0
36.15	9.20188	1.10136	-23.77	0.0609277	190.714	0.0190714	151.03	8.35501	482.495
38.75	3.55556	8.47572	-21.95	0.389897	237.668	0.0237668	9.11922	0.419499	149.602
40.8	1.83486	8.40156	-22.68	0.0494837	243.085	0.0243085	37.0802	0.218395	75.4823
42.15	2.17593	5.93065	-24.37	0.046174	619.244	0.0619244	47.1244	0.366895	35.1384
42.95	1.96078	7.02388	-24.26	0.055332	173.719	0.0173719	35.4367	0.27916	112.871
43.95	4.21801	7.27899	-24.46	0.0559089	124.018	0.0124018	75.4443	0.579477	340.114
45.01	3.90476	7.07215	-24.35	0.0535395	172.854	0.0172854	72.9323	0.552132	225.9
45.8	2.57426	7.20813	-24.83	0.0668346	91.4055	0.00914055	38.5168	0.357133	281.63
49.15	12.7363	6.80651	-25.63	0.031529	165.939	0.0165939	403.956	1.8712	767.528	520.622	16.5355
49.55	8.39623	6.84477	-25.64	0.063139	431.255	0.0431255	132.98	1.22666	194.693	Hg spikes interval
50.52	12.6923	7.12947	-25.79	0.0422191	125.553	0.0125553	300.629	1.78026	1010.92
51.1	30.9953	6.1903	-23.97	0.0931366	253.673	0.0253673	332.794	5.00707	1221.86
51.6	26.8159	6.33991	-23.51	0.0865294	409.359	0.0409359	309.905	4.2297	655.072
52.4	287.015	9.244	-24.15	0.395234	185.05	0.018505	726.19	31.0488	15510.2
52.5	101.401	7.46447	-24.51	0.0935034	160.331	0.0160331	1084.46	13.5845	6324.47
52.6	71.2381	8.69386	-23.85	0.0728937	172.058	0.0172058	977.288	8.19407	4140.34
52.8	89.5349	8.98226	-23.44	0.0675924	127.974	0.0127974	1324.63	9.96797	6996.33
52.9	75.7075	8.72172	-23.36	0.0732708	167.429	0.0167429	1033.26	8.68035	4521.77
53	57.5799	8.71233	-28.45	0.107042	136.797	0.0136797	537.921	6.60902	4209.16
53.1	35.2709	8.55192	-28.28	0.110148	211.353	0.0211353	320.214	4.12433	1668.81
53.2	49.417	8.47753	-24.24	0.0730271	129.733	0.0129733	676.694	5.82918	3809.15
53.4	36.0465	8.66181	-24.7	0.0828803	152.492	0.0152492	434.922	4.16155	2363.82
53.6	55.6364	8.61164	-27.69	0.114969	184.24	0.018424	483.923	6.4606	3019.78
53.8	35.6682	8.72111	-23.96	0.0820474	185.885	0.0185885	434.727	4.08987	1918.83
54	41.3889	8.5005	-29.62	0.146291	167.672	0.0167672	282.921	4.86899	2468.44
54.2	27.6887	8.61531	-24.01	0.0759666	200.695	0.0200695	364.485	3.21389	1379.64
54.23	24.4131	7.93469	-24.36	0.0984536	166.927	0.0166927	247.966	3.07676	1462.5
54.25	19.7143	9.12022	-24.23	0.0692467	179.711	0.0179711	284.696	2.1616	1097
54.3	11.6908	8.78091	-25.84	0.0490181	154.74	0.015474	238.5	1.33139	755.515
54.5	3.41121	10.463	-26.65	0.254294	119.503	0.0119503	13.4144	0.326027	285.449	31.4851
56.22	3.90698	8.38945	-24.02	0.0673148	156.094	0.0156094	58.0403	0.465701	250.296	pre-Hg spikes interval
59.5	3.82353	9.13607	-24.19	0.0992404	554.378	0.0554378	38.528	0.418509	68.9697
60.5	3.27189	9.21112	-24	0.108734	162.614	0.0162614	30.0908	0.355211	201.205
62.35	2.43902	8.39109	-24.14	0.096813	157.583	0.0157583	25.1932	0.290668	154.778
64.2	4.2029	8.18703	-23.77	0.134155	93.3265	0.00933265	31.3287	0.513361	450.344
65.42	2.63636	9.25004	-23.68	0.140506	168.111	0.0168111	18.7633	0.285011	156.823
66.62	2.76018	11.4733	-23.76	0.0987965	154.985	0.0154985	27.938	0.240574	178.094
68.22	3.14159	9.8793	-23.88	0.108159	232.403	0.0232403	29.0461	0.317997	135.179
71.4	2.54902	11.802	-23.8	0.143346	306.497	0.0306497	17.7823	0.215982	83.1663
72.65	2.71429	9.46036	-24.15	0.124975	311.259	0.0311259	21.7186	0.286912	87.2033
73.55	0	9.55357	-24.02	0.106875	145.755	0.0145755	0	0	0
74.32	3.39713	9.74592	-23.59	0.143199	162.898	0.0162898	23.7231	0.348569	208.543
76.2	1.61435	11.1181	-23.99	0.0960373	117.205	0.0117205	16.8096	0.1452	137.737
77.1	3.46341	7.91117	-24.5	0.0867062	94.3799	0.00943799	39.9443	0.437788	366.965
77.6	1.88119	11.9739	-24.04	0.0730354	192.334	0.0192334	25.7572	0.157108	97.8083
79.15	2.18447	11.3154	-23.83	0.244972	144.303	0.0144303	8.91721	0.193053	151.381
80.9	1.6055	11.0551	-23.54	0.200195	233.93	0.023393	8.0197	0.145227	68.6317
83.8	1.21495	9.79725	-23.42	0.292294	236.754	0.0236754	4.15661	0.12401	51.317
84.5	19.2694	9.03912	-24.09	0.0912596	173.215	0.0173215	211.149	2.13178	1112.46
85.95	17.9512	7.48164	-24.16	0.102871	185.511	0.0185511	174.503	2.39937	967.666
86.7	6.04651	11.6186	-23.39	0.194962	234.569	0.0234569	31.0138	0.520419	257.771
87.37	3.80952	11.3461	-23.38	0.179985	268.449	0.0268449	21.1658	0.335756	141.909
88.73	1.30045	9.59719	-23.67	0.148322	190.567	0.0190567	8.76771	0.135503	68.241
90.45	2.05607	11.8083	-23.1	0.394091	293.983	0.0293983	5.21726	0.174121	69.9385
91.5	1.52778	10.8221	-23.29	0.194053	223.647	0.0223647	7.873	0.141172	68.3121
93	1.10599	10.6381	-23.43	0.179881	231.169	0.0231169	6.14847	0.103965	47.8435
93.5	1.84466	10.776	-23.69	0.157525	187.131	0.0187131	11.7103	0.171183	98.5758
95.55	1.65179	10.0073	-23.7	0.143226	1178.95	0.117895	11.5328	0.165058	14.0106
96.2	2.0362	10.023	-23.97	0.12493	835.519	0.0835519	16.2988	0.203152	24.3705
TOC, total organic carbon.
δ13Corg values are relative to the Vienna Pee Dee Belemnite.
Depths are measured in metres (m) relative to the top of the core.
Depth	Δ199Hg
m	‰
15.15	-0.0164058
23.05	0.0291393
36.15	-0.00521234
51.1	-0.0282469
51.6	0.0515814
52.4	-0.056131
52.5	0.00469375
52.6	-0.0941537
52.8	-0.0126212
53	0.00199395
53.2	-0.0385286
54	-0.0828905
66.62	-0.0429537
74.32	-0.0395291
84.5	-0.0804718
Pingyi Basin
Depth	Hg	Al	Hg/Al	Average Hg/Al	Enrichment factor	TOC	S	S	Hg/S
m	ppb	ppm	ppb/%			%	ppm	%	ppb/%
1	12.7753	5017.88	25.4596	5.31673	0.933175	0.127937	2531.28	0.253128	50.4699
1.9	9.11215	4229.21	21.5458	post-Hg spikes interval		0.196241	2208.43	0.220843	41.2608
2.5	8.09524	10794.7	7.49927			0.135178	1122.24	0.112224	72.1345
3.6	13.8806	10211	13.5938			0.243315	2711.69	0.271169	51.188
4.85	4.29907	2433.41	17.6668			0.0958868	1395.23	0.139523	30.8125
6.6	13.5681	10273.1	13.2074			0.147095	1527.93	0.152793	88.8003
6.88	7.9703	27660.4	2.88149			0.0664388	541.388	0.0541388	147.22
7	10.7843	33785.3	3.19202			0.0744636	561.988	0.0561988	191.896
7.08	11.2745	28766.1	3.91937			0.0548076	301.546	0.0301546	373.89
7.28	12.9612	46420.5	2.79212			0.0874559	461.188	0.0461188	281.039
7.48	18.5388	26580.9	6.97449			0.193444	1840.68	0.184068	100.717
7.68	32.3256	24129.5	13.3967			0.0925441	1262.09	0.126209	256.127
7.88	27.0588	27675.2	9.77728			0.0139271	929.496	0.0929496	291.113
8.08	9.09091	17040.2	5.33497			0.0445188	960.538	0.0960538	94.6439
8.4	14.6154	22032.1	6.63367			0.301316	2636.46	0.263646	55.4356
8.93	27.4648	31687.5	8.66739			0.34049	2491.87	0.249187	110.217
9.8	8.96714	14708.9	6.09641			0.227961	2241.6	0.22416	40.0032
9.91	6.99507	13052	5.35938			0.202353	1630.35	0.163035	42.9052
10.98	21.4419	37211.9	5.76209			1.20509	3006.41	0.300641	71.3204
12.3	5.90476	9514.08	6.20634			0.18318	1942.55	0.194255	30.3969
13	29.8537	22465.3	13.2888			0.559126	10649.3	1.06493	28.0336
14.1	23.0348	16569.8	13.9017			0.843727	4269.69	0.426969	53.9496
15.2	32.5728	16434.7	19.8195			1.52835	5826.72	0.582672	55.9025
16.05	17.4877	8700.43	20.0998			0.386549	13382.8	1.33828	13.0673
17.4	17.7103	54469.2	3.25143			2.05028	8355.31	0.835531	21.1964
18.8	12.3009	49532.4	2.4834			0.291242	8470.39	0.847039	14.5222
20.9	4.75113	28514.1	1.66624			0.0695472	4205.78	0.420578	11.2967
24.05	4.49074	32392.7	1.38634			0.0738785	6696.33	0.669633	6.70627
24.2	5.69444	24934.3	2.28378			0.0347187	3500.28	0.350028	16.2685
24.4	4.03846	33897.5	1.19138			0.0351813	7176.79	0.717679	5.62711
24.6	3.61111	26385.9	1.36857			0.0251426	3592	0.3592	10.0532
24.8	11.6204	33987.9	3.41897			0.0330184	5384.26	0.538426	21.5821
25	8.94009	31723	2.81817			0.0307875	943.341	0.0943341	94.7705
25.2	10.3182	34362.7	3.00273			0.029583	820.789	0.0820789	125.71
25.25	16.3063	36247.2	4.49864			0.0921533	732.364	0.0732364	222.653
25.5	5.06849	33703.6	1.50384			0.0346951	250.272	0.0250272	202.519
25.7	4.56221	40621.4	1.12311			0.0294859	288.858	0.0288858	157.94
25.9	11.435	50206.7	2.27758			0.0381888	318.966	0.0318966	358.502
26.15	7.06731	44952.2	1.57218			0.0837624	225.462	0.0225462	313.459
27.65	8.75	50493.4	1.7329			0.091922	218.014	0.0218014	401.35
29.48	4.66667	46630.7	1.00077			0.0915913	333.98	0.033398	139.729
30.4	2.59259	29430.8	0.88091			0.0820723	371.636	0.0371636	69.7617
30.6	3.74429	29606	1.26471			0.0492444	324.7	0.03247	115.316
30.8	4.13793	35208.4	1.17527			0.0402865	316.677	0.0316677	130.667
31	4.90654	32891.1	1.49176			0.0450212	255.172	0.0255172	192.284
31.2	5.70093	23040.5	2.47431			0.0293489	283.974	0.0283974	200.756
31.6	6.71171	23275.6	2.88358			0.0405147	238.526	0.0238526	281.383
31.75	8.90995	24147.9	3.68974			0.0322007	322.42	0.032242	276.346
32	10.5941	25280.5	4.19061			0.0407497	222.065	0.0222065	477.07
32.2	8.97674	27827.9	3.2258			0.137032	256.626	0.0256626	349.798
33.67	5.74879	23469.4	2.44948			0.0814838	136.028	0.0136028	422.618
35.1	3.41584	40936.8	0.834419			0.102283	176.833	0.0176833	193.168
36.62	1.42857	38297.9	0.373015			0.0768358	178.557	0.0178557	80.0064
36.8	3.5023	35732.7	0.98014			0.104035	176.634	0.0176634	198.281
38.7	2.62136	46215.8	0.5672			0.0884098	626.394	0.0626394	41.8484
39.1	1.38249	46516.2	0.297206			0.100594	289.837	0.0289837	47.6988
39.9	1.7734	57062.2	0.310783			0.0925638	256.741	0.0256741	69.0735
40.7	1.48837	47207.8	0.315281			0.113339	197.933	0.0197933	75.1958
41.2	2.24299	42594.2	0.526595			0.0341973	180.89	0.018089	123.998
41.4	3.91892	27662.6	1.41668			0.0939209	188.916	0.0188916	207.443
41.6	10.4464	35360.4	2.95427	8.71305	1.52929	0.0270693	280.088	0.0280088	372.969
41.8	12.2685	48477.3	2.53078	Hg spikes interval		NA	238.845	0.0238845	513.661
41.93	8.23529	40482.3	2.03429			0.0907972	191.593	0.0191593	429.832
42	9.85981	47347.9	2.08242			0.0444999	189.376	0.0189376	520.648
42.2	15.8605	61453.1	2.58091			0.0614692	133.339	0.0133339	1189.48
42.3	15.4976	63165.9	2.45348			0.0954121	182.66	0.018266	848.441
42.4	20.8372	46507	4.48045			0.0767139	267.573	0.0267573	778.749
42.5	21.9512	49605.2	4.42518			0.106717	272.651	0.0272651	805.103
42.6	19.0865	53583	3.56205			0.120151	378.186	0.0378186	504.686
42.75	17.6018	49595.4	3.54908			0.129844	410.77	0.041077	428.507
42.95	133.252	48245.3	27.6197			0.0607556	401.469	0.0401469	3319.12
43.2	36.758	7393.01	49.7199			0.541069	496.891	0.0496891	739.759
43.4	3.86364	5244.02	7.3677			0.121806	473.528	0.0473528	81.5925
43.6	6.43519	8031.55	8.01239			0.0980858	663.837	0.0663837	96.9393
43.97	6.79426	9277.8	7.32313			0.0392087	531.407	0.0531407	127.854
44.95	4.90566	11820	4.15031	5.69746		0.0554853	223.5	0.02235	219.493
46.65	2.69767	12612.6	2.13888	pre-Hg spikes interval		0.0687802	429.078	0.0429078	62.8714
48.1	2.47573	3443.15	7.19029			0.0211169	394.568	0.0394568	62.7453
48.95	1.98113	2940.83	6.73663			0.0244637	325.823	0.0325823	60.8039
49.8	4.10714	4591.73	8.94466			0.036699	540.236	0.0540236	76.025
50.75	2.11538	2764.56	7.6518			0.0543646	437.272	0.0437272	48.3769
51.86	0	1363.31	0			0.0102806	322.988	0.0322988	0
53.15	1.46789	1996.59	7.35198			0.0140368	728.04	0.072804	20.1622
54.4	5.02347	9290.05	5.40737			0.123206	1219.48	0.121948	41.1936
54.9	7.97297	3171.69	25.1379			0.0603429	927.538	0.0927538	85.9585
56.51	1.82648	2050.55	8.90731			0.0280162	459.74	0.045974	39.7286
60.28	2.98246	3992.6	7.46996			0.155462	349.801	0.0349801	85.2616
61.5	10.6849	12585.1	8.49014			0.0887032	881.841	0.0881841	121.166
62.7	19.7664	48500	4.07554			0.177763	1173.07	0.117307	168.502
63.9	10.6512	20658	5.15596			0.27934	2984.5	0.29845	35.6882
64.8	19.863	19648.9	10.109			0.234493	2535.92	0.253592	78.3266
65.3	4.68599	5811.51	8.06329			0.102751	1397.52	0.139752	33.5307
66.25	2.39234	14121.1	1.69417			0.0608391	777.395	0.0777395	30.7738
67.85	2.40196	10374.5	2.31525			0.0380076	685.932	0.0685932	35.0175
68.55	2.98578	10363.2	2.88113			0.0656185	509.174	0.0509174	58.6397
70	5.22167	16481.5	3.1682			0.0675457	732.309	0.0732309	71.3042
71.9	1.875	2435.08	7.69994			0.0373363	407.51	0.040751	46.0111
72.6	3.04348	5895.44	5.16243			0.0483885	423.241	0.0423241	71.9088
74.3	2.43902	9279.7	2.62834			0.0503506	548.498	0.0548498	44.4674
75.3	2.34234	6671.13	3.51116			0.0292212	418.101	0.0418101	56.0233
76.5	2.01794	11723.2	1.72131			0.046411	759.426	0.0759426	26.5719
77.55	4.38679	17812.7	2.46274			0.0647257	666.337	0.0666337	65.8344
79.04	18.5854	51070.7	3.63915			0.181266	1381.62	0.138162	134.519
80.35	7.32759	24382.6	3.00525			0.201925	3213.68	0.321368	22.8013
81.05	32.0168	76590.4	4.18026			0.471701	3061.86	0.306186	104.566
82.3	20.8547	82527.3	2.52701			0.581691	1257.57	0.125757	165.833
83.1	10.7339	27443.8	3.91125			0.437186	4294.24	0.429424	24.9961
83.5	5.3271	17636.3	3.02053			0.351656	3596.68	0.359668	14.8112
84.99	14.5192	17030.4	8.52546			0.261292	4155.65	0.415565	34.9386
85.78	10.1681	27395.7	3.71156			0.672901	7800.79	0.780079	13.0347
87.27	18.6667	19079.1	9.78383			0.28805	4774.63	0.477463	39.0955
88.6	44.6847	53992.7	8.27607			0.233165	1714.92	0.171492	260.564
NA, not analysed.
TOC, total organic carbon.
δ13Corg, δ13CPDB, and δ18OPDB values are relative to the Vienna Pee Dee Belemnite.
Depths are measured in metres (m) relative to the top of the core.
Depth	δ13CPDB	δ18OPDB	Depth	Δ199Hg
m	‰	‰	m	‰
1	-7.24	-8.21	7.88	-0.0550952
1.9	-6.51	-8.09	15.2	-0.114741
2.5	-6.93	-7.11	25.2	0.0279592
3.6	-6.8	-8.65	32	0.116959
4.85	-6.79	-8.04	42.2	0.0618725
6.6	-6.385	-7.178	42.5	0.0641828
7.28	-6.14	-7.033	42.75	0.110864
8.4	-6.943	-7.874	42.95	0.270249
8.93	-7.097	-7.815	43.2	0.129404
9.91	-7.376	-7.567	43.6	0.161448
10.98	-8.223	-7.529	43.97	0.16678
12.3	-7.701	-7.255	54.9	0.0702138
13	-7.819	-8.026	62.7	-0.0125997
14.1	-7.259	-8.815	79.04	0.064714
15.2	-7.768	-9.727	88.6	0.00312716
16.05	-7.875	-11.427
17.4	-6.169	-8.199
18.8	-7.254	-7.275
20.9	-6.623	-7.642
24.05	-6.918	-7.86
25.25	-7.43	-7.927
26.15	-7.699	-7.98
27.65	-7.578	-8.109
29.48	-6.987	-8.24
30.4	-6.923	-8.102
31.75	-5.81	-7.991
33.67	-5.56	-8.483
35.1	-5.889	-7.876
36.62	-6.595	-7.995
36.8	-6.326	-8.082
38.7	-7.265	-7.497
39.1	-7.541	-7.743
39.9	-7.398	-7.921
40.7	-6.872	-7.18
41.2	-7.95	-8.018
41.4	-7.286	-7.546
41.6	-7.099	-7.216
41.8	-6.952	-7.182
41.93	-7.015	-7.265
42	-6.999	-7.179
42.2	-8.561	-7.946
42.3	-8.21	-7.95
42.4	-8.477	-7.881
42.5	-8.346	-7.83
42.6	-5.563	-7.872
42.75	-9.179	-7.824
42.95	-6.426	-8.073
43.2	-9.998	-8.148
43.4	-8.331	-8.008
43.6	NA	NA
43.97	-6.048	-7.489
44.95	-6.18	-7.828
46.65	-6.737	-7.322
48.1	-5.972	-7.899
48.95	-5.789	-7.844
49.8	-5.992	-7.8
50.75	-5.808	-7.313
51.86	-5.44	-7.9
53.15	-5.581	-7.647
54.4	-5.334	-7.516
54.9	-5.361	-7.908
56.51	-5.756	-7.973
60.28	-5.564	-7.737
61.5	-4.786	-6.77
62.7	-6.714	-7.38
63.9	-4.885	-7.322
64.8	-4.889	-7.647
65.3	-4.787	-7.702
66.25	-5.303	-7.712
67.85	-4.947	-7.361
68.55	-5.269	-8.722
70	-5.467	-7.626
71.9	-5.148	-7.451
72.6	-5.162	-7.692
74.3	-5.196	-7.243
75.3	-5.191	-7.767
76.5	-5.232	-6.942
77.55	-5.263	-7.532
79.04	-5.061	-7.459
80.35	-4.551	-7.422
81.05	-5.894	-7.913
82.3	-5.632	-7.922
83.1	-5.201	-7.997
83.5	-5.023	-9.183
84.99	-6.119	-7.18
85.78	-4.763	-7.597
87.27	-5.358	-6.82
88.6	-8.232	-7.82

## Sheet: G50016
Li, S., et al., 2022, Mercury evidence of Deccan volcanism driving the Latest Maastrichtian warming event: Geology, v. 50, https://doi.org/10.1130/G50016.1
